# Supplementary material for: Synthetic ShK-like Peptide from the Jellyfish Nemopilema nomurai Has Human Voltage-Gated Potassium-Channel-Blocking Activity
Source: MDPI journal article supplement (doi:10.3390/md22050217), 2024-05-13
Supplement: s1 [file s1]

## MS Spectrum

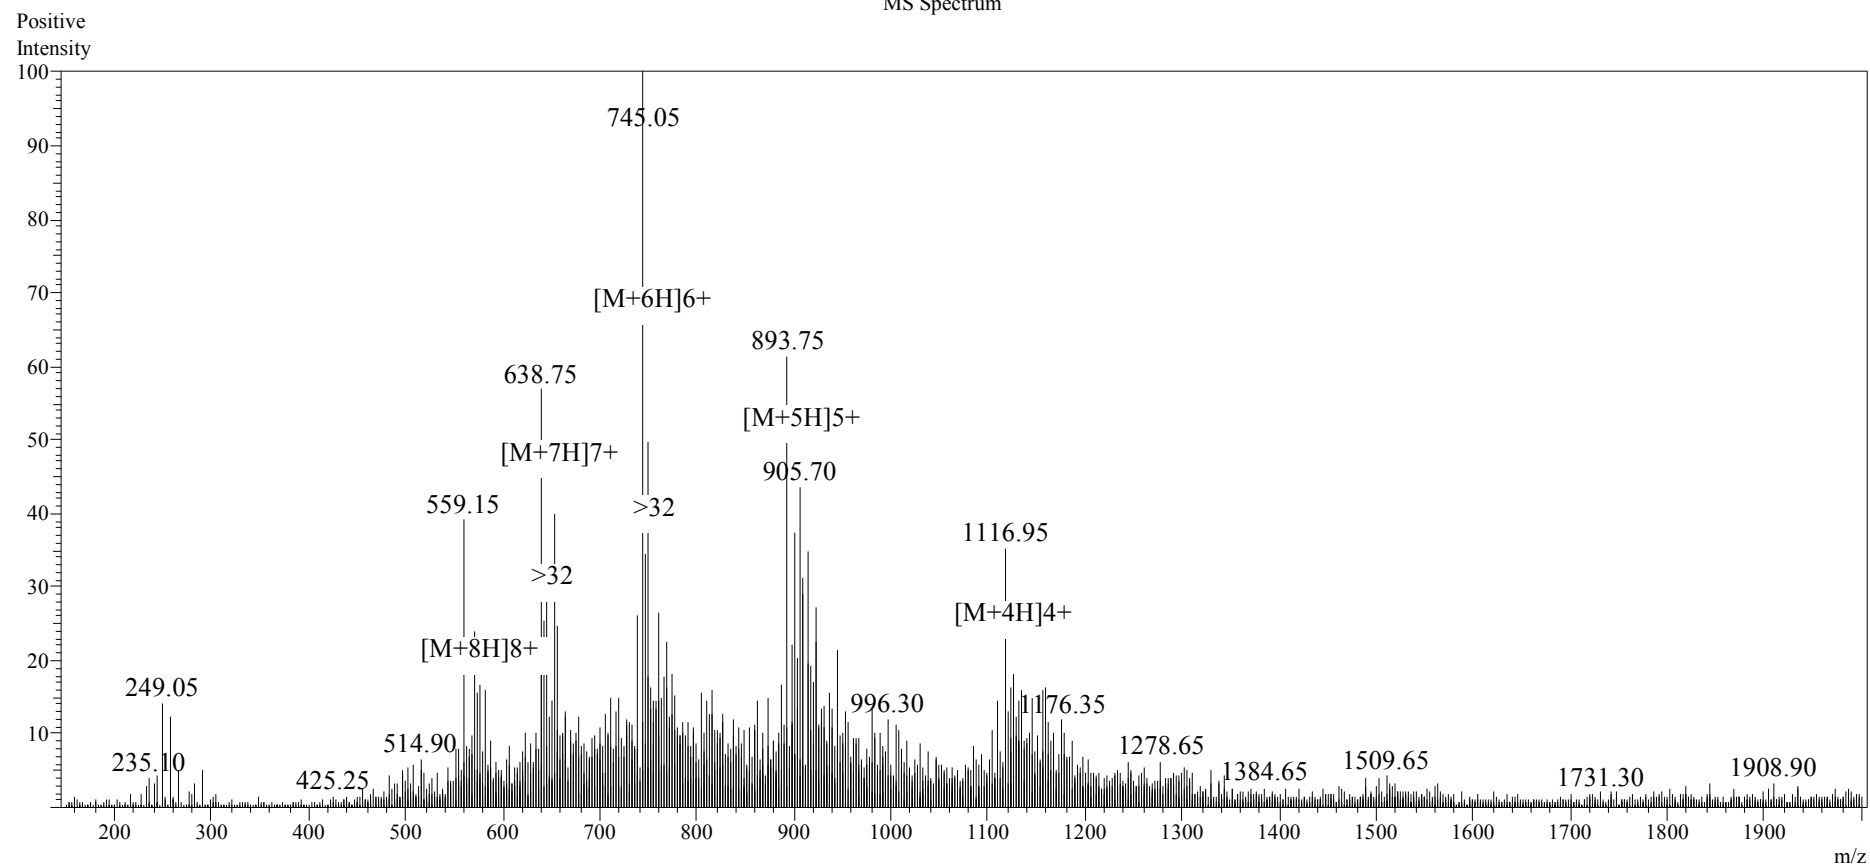

Sample Information

Dissolution method : 3% HAC + 25% ACN + 72% H<sub>2</sub>O  
Date Acquired : 2019/12/5 14:42:51  
Injection Volume : 1 µl

Interface

Nebulizing Gas Flow : 1.50 L/min  
CDL Temp : 250°C  
CDL Volt : 0 V  
Block Temp : 200

: ESI

: 1.50 L/min  
: 250°C  
: 0 V  
: 200

Prerod Bias  
Detector  
T.Flow  
B.conc

: +4.5 kV  
: -0.2 kV  
: 0.2 ml/min  
: 30% H<sub>2</sub>O / 70% MeOH

Name

Sequence

Lot No

Theoretical

Observed

: g5156.t1-3  
: \*CKDHHTYGVY\*CKDWKSSGE\*CKKNPKGMRHF\*CRKT\*CGF\*C  
: PCM14777-1-1023  
: 4464.24  
: 4464.30
