# Supplementary material for: Synthetic ShK-like Peptide from the Jellyfish Nemopilema nomurai Has Human Voltage-Gated Potassium-Channel-Blocking Activity
Source: MDPI journal article supplement (doi:10.3390/md22050217), 2024-05-13
Supplement: s1 [file s1]

## MS Spectrum

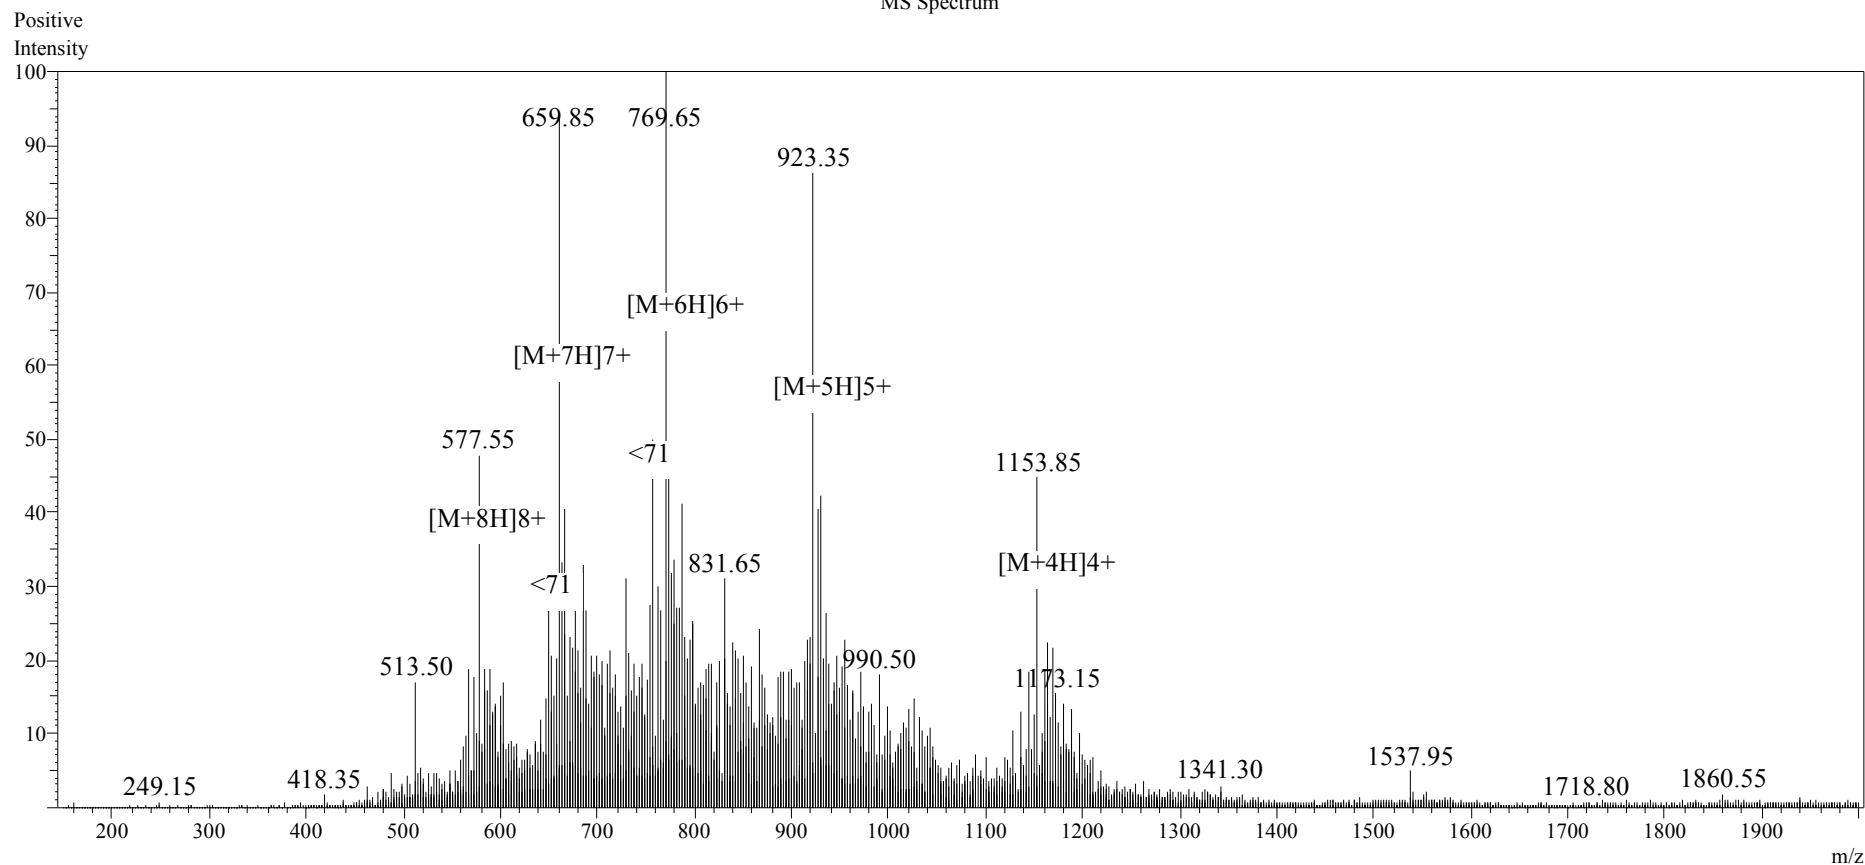

Sample Information

Dissolution method :3%HAC+25%ACN+72%H2O  
Date Acquired : 2019/12/3 14:55:14  
Injection Volume : 1ul

Interface

Nebulizing Gas Flow :ESI  
CDL Temp :1.50L/min  
CDL Volt :250C  
Block Temp :0v  
:200

Prerod Bias

Detector :+4.5kv  
T.Flow :-0.2kv  
B.conc :0.2ml/min  
:30%H2O/70%MeOH

Name :g5156.t1-3  
Sequence :CKDHHTYGVY\*CKDWKSSGECKKNPKGMRHF\*CRKTCGFC  
Lot No :PCM14777-1-1023  
Theoretical :4612.24  
Observed :4611.90
