# Supplementary material for: Synthetic ShK-like Peptide from the Jellyfish Nemopilema nomurai Has Human Voltage-Gated Potassium-Channel-Blocking Activity
Source: MDPI journal article supplement (doi:10.3390/md22050217), 2024-05-13
Supplement: s1 [file s1]

# MS Spectrum

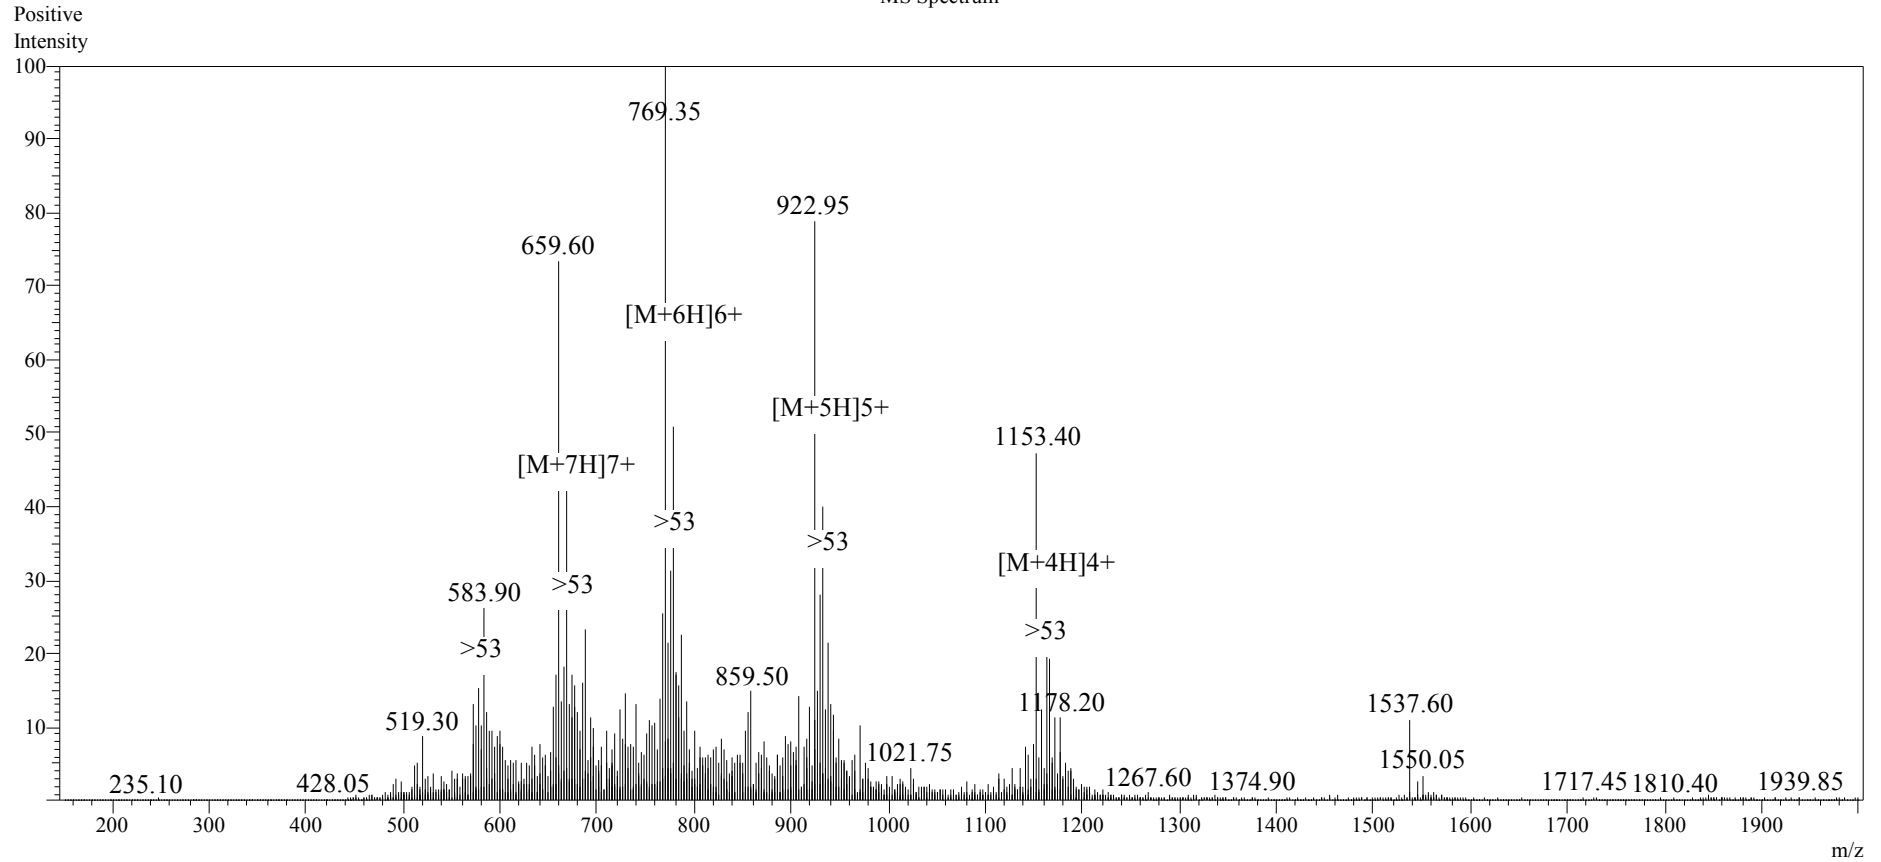

## Sample Information

Dissolution method :3%HAC+25%ACN+72%H2O  
 Date Acquired : 2019/12/3 14:53:45  
 Injection Volume : 1ul

## Interface

Nebulizing Gas Flow :ESI  
 CDL Temp :1.50L/min  
 CDL Volt :250C  
 Block Temp :0v  
 :200

Prerod Bias :+4.5kv  
 Detector :-0.2kv  
 T.Flow :0.2ml/min  
 B.conc :30%H2O/70%MeOH

Name :g5156.t1-3  
 Sequence :\*CKDHHTYGVY\*CKDWKSSGECKKNPKGMRHF\*CRKTCGF\*C  
 Lot No :PCM14777-1-1023  
 Theoretical :4610.24  
 Observed :4610.10
