# Supplementary figures and images for: Synthetic ShK-like Peptide from the Jellyfish Nemopilema nomurai Has Human Voltage-Gated Potassium-Channel-Blocking Activity
Source: MDPI journal article supplement (doi:10.3390/md22050217), 2024-05-13

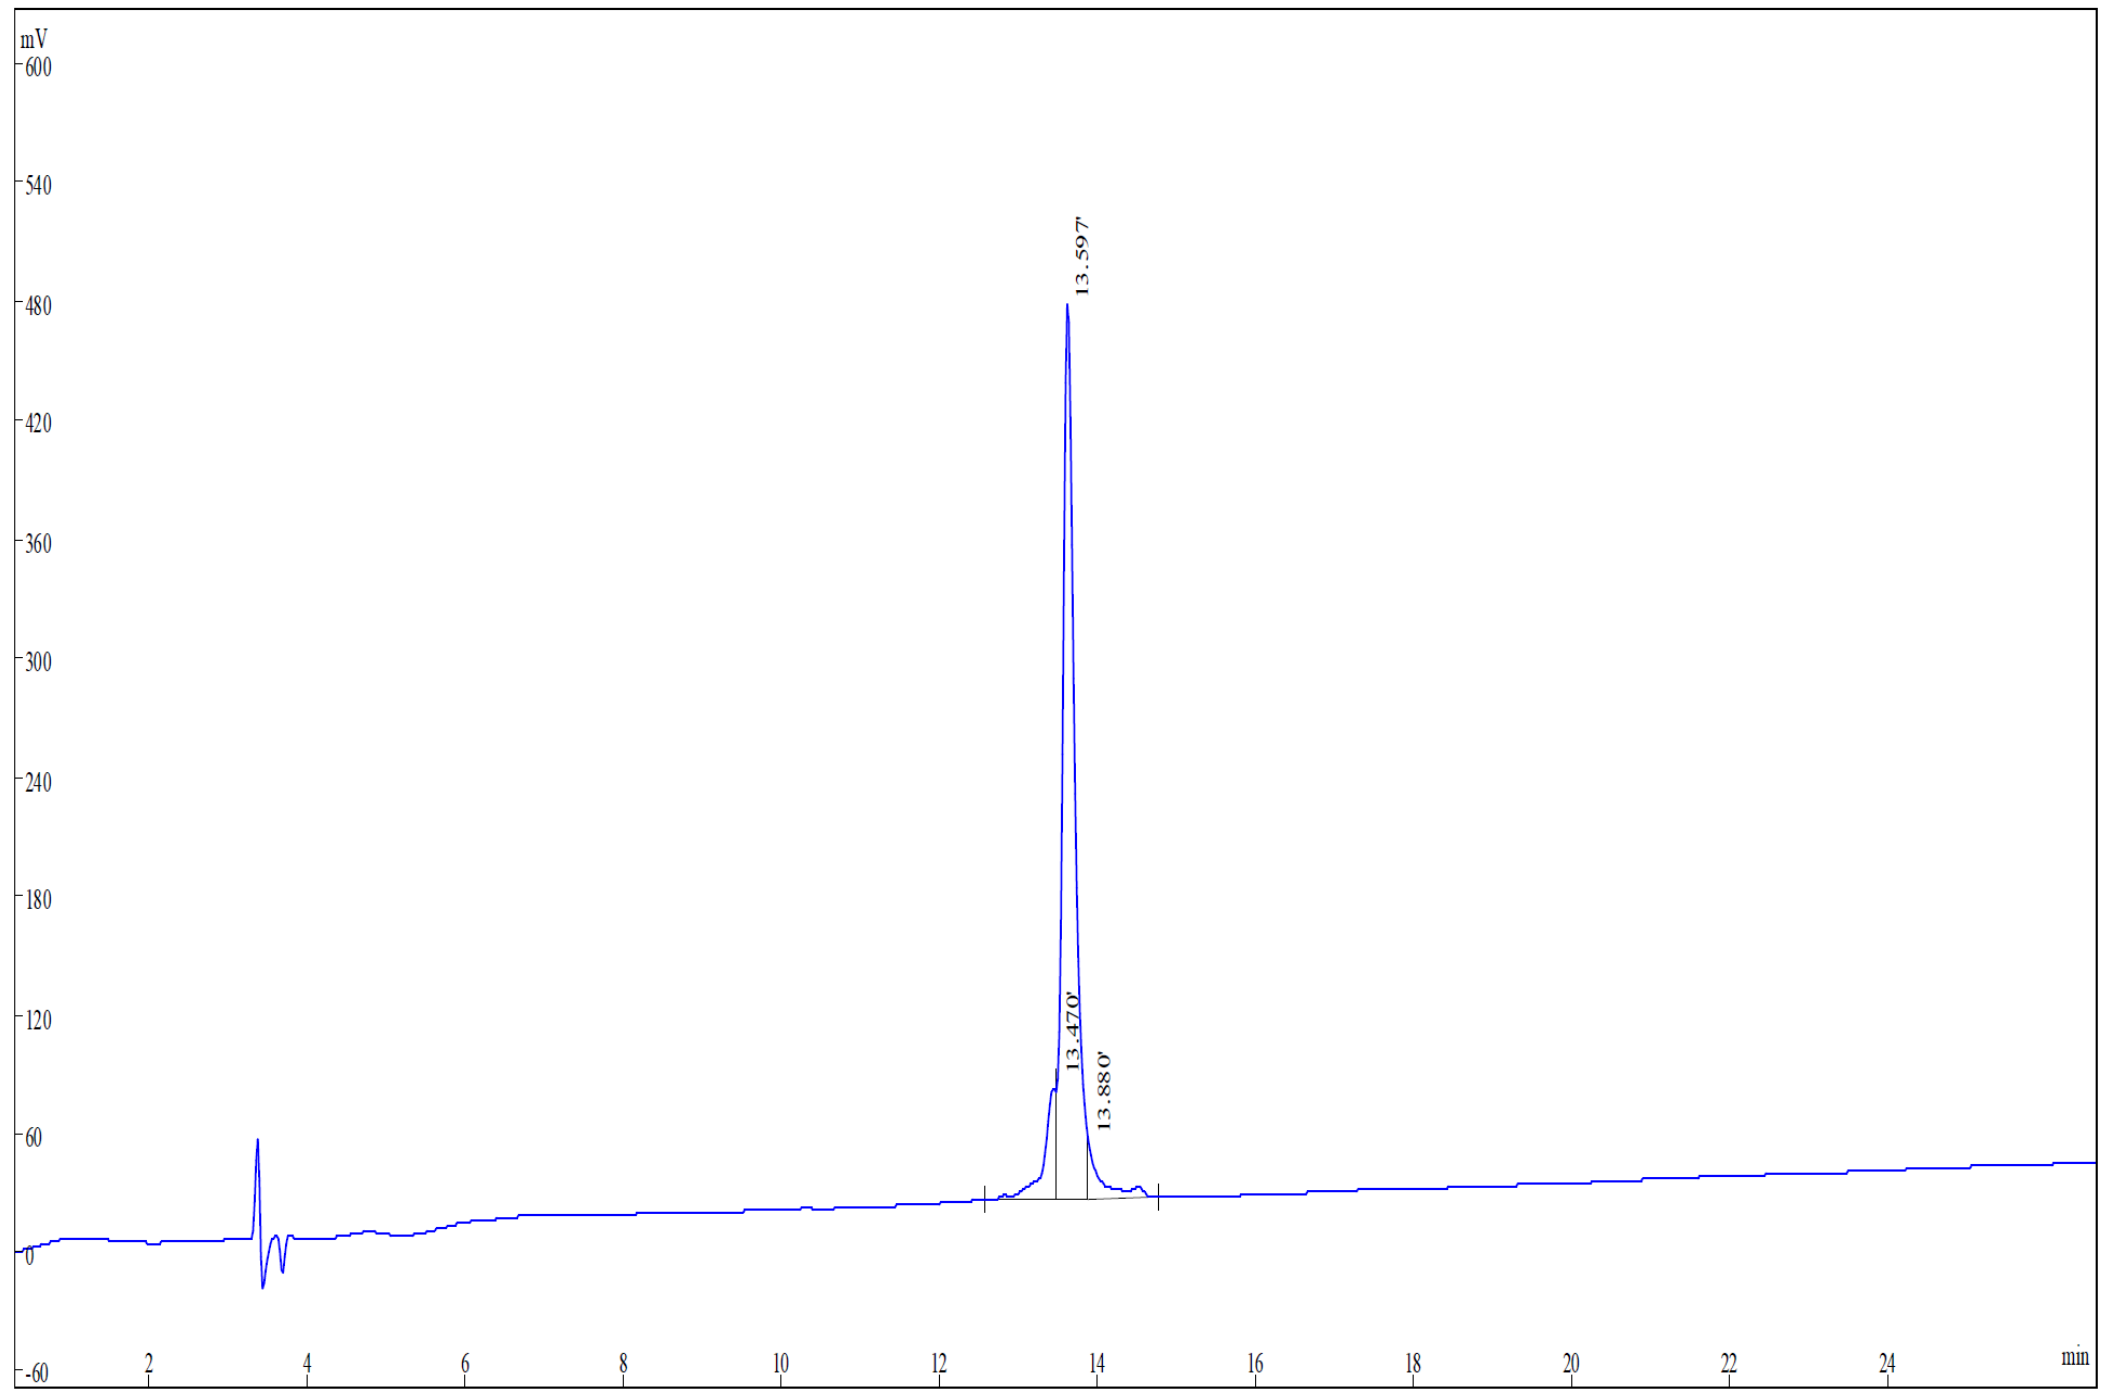

Supplement: s1 [file s1]
